# Supplementary material
Source: Royal Society of Chemistry journal article supplement (doi:10.1039/d6ea00036c)
Supplement: d6ea00036c1.pdf [file d6ea00036c1.pdf]

1 **Supplementary Information**

2 **Traffic-Induced Air Pollution at Traffic Intersections in Dhaka: Seasonal Patterns and**  
3 **Associated Health Implications**

4

5 Md. Khorshed Alam Howlader<sup>a</sup>, Shahid Uz Zaman<sup>b\*</sup>, Md. Al-Amin Hossen<sup>a</sup>, Md. Adnan  
6 Kiber<sup>c</sup>, Abdus Salam<sup>a</sup>

7

8 <sup>a</sup>Department of Chemistry, Faculty of Science, University of Dhaka, Dhaka-1000, Bangladesh

9 <sup>b</sup>Department of Chemistry, Faculty of Science, Bangladesh University of Engineering and  
10 Technology, Dhaka-1000, Bangladesh

11 <sup>c</sup>Department of Electrical and Electronics Engineering, Faculty of Engineering and  
12 Technology, University of Dhaka, Dhaka-1000, Bangladesh

13

14 \*Corresponding author's email: [suzaman@chem.buet.ac.bd](mailto:suzaman@chem.buet.ac.bd); [shahiduzzamanadil@gmail.com](mailto:shahiduzzamanadil@gmail.com)

15

16

17

18

19

20

21

| Sampling site | Traffic intersection | Specification of sampling site     | Geographical coordinates  |
|---------------|----------------------|------------------------------------|---------------------------|
| S1            | Mirpur-10            | Hospital area and shopping complex | 23°48'24.9"N 90°22'06.6"E |
| S2            | Mirpur-1             | Hospital and residential area      | 23°46'54.4"N 90°21'06.4"E |
| S3            | Gulistan             | Mosque and market place area       | 23°43'40.2"N 90°24'37.8"E |
| S4            | Banani               | Residential area and school        | 23°47'49.1"N 90°24'06.0"E |
| S5            | Bijoy Sarani         | Administrative and corporate area  | 23°45'52.1"N 90°23'19.4"E |

22 Table S1 The table displays each location's situation in relation to its geographic coordination

23

24 Table S2 Pearson's correlation of air pollutant concentration at different traffic intersections of

25 Dhaka City, Bangladesh

| Winter            |                   |                   |                  |                 |                 |
|-------------------|-------------------|-------------------|------------------|-----------------|-----------------|
| Pollutants        | PM <sub>1.0</sub> | PM <sub>2.5</sub> | PM <sub>10</sub> | CO <sub>2</sub> | NO <sub>2</sub> |
| PM <sub>1.0</sub> | 1                 |                   |                  |                 |                 |
| PM <sub>2.5</sub> | 0.530             | 1                 |                  |                 |                 |
| PM <sub>10</sub>  | -0.053            | <b>0.785</b>      | 1                |                 |                 |
| CO <sub>2</sub>   | 0.453             | 0.127             | -0.303           | 1               |                 |
| NO <sub>2</sub>   | 0.306             | -0.009            | -0.414           | <b>0.962</b>    | 1               |
| Pre-monsoon       |                   |                   |                  |                 |                 |
|                   | PM <sub>1.0</sub> | PM <sub>2.5</sub> | PM <sub>10</sub> | CO <sub>2</sub> | NO <sub>2</sub> |
| PM <sub>1.0</sub> | 1                 |                   |                  |                 |                 |
| PM <sub>2.5</sub> | <b>0.577</b>      | 1                 |                  |                 |                 |
| PM <sub>10</sub>  | 0.348             | <b>0.954</b>      | 1                |                 |                 |
| CO <sub>2</sub>   | -0.363            | 0.380             | <b>0.639</b>     | 1               |                 |
| NO <sub>2</sub>   | 0.392             | 0.016             | -0.248           | -0.848          | 1               |

26

27

28

29 Table S3 P-values of air pollutant concentrations at different traffic intersections of Dhaka City,

30 Bangladesh

| Pollutants                              | P-values |             |
|-----------------------------------------|----------|-------------|
|                                         | Winter   | Pre-monsoon |
| PM <sub>1.0</sub> and PM <sub>2.5</sub> | 2.17E-05 | 7.5E-05     |
| PM <sub>1.0</sub> and PM <sub>10</sub>  | 2.28E-06 | 2.53E-05    |
| PM <sub>2.5</sub> and PM <sub>10</sub>  | 0.005    | 0.003       |
| PM <sub>1.0</sub> and CO <sub>2</sub>   | 1.47E-13 | 1.1E-15     |
| PM <sub>2.5</sub> and CO <sub>2</sub>   | 6.49E-13 | 1.6E-13     |
| PM <sub>10</sub> and CO <sub>2</sub>    | 1.63E-12 | 3.58E-11    |
| PM <sub>1.0</sub> and NO <sub>2</sub>   | 0.002818 | 2.47E-07    |
| PM <sub>2.5</sub> and NO <sub>2</sub>   | 1.13E-06 | 5E-07       |
| PM <sub>10</sub> and NO <sub>2</sub>    | 2.84E-07 | 1.96E-06    |
| NO <sub>2</sub> and CO <sub>2</sub>     | 6.19E-14 | 9.12E-17    |

31

32

33 Table S4 Principal Component Analysis (PCA) of winter data: eigenvalues and explained  
34 variance

35

|   | Eigenvalue | Percentage of Variance | Cumulative |
|---|------------|------------------------|------------|
| 1 | 2.61355    | 52.27%                 | 52.27%     |
| 2 | 2.2553     | 45.11%                 | 97.38%     |
| 3 | 0.08489    | 1.70%                  | 99.07%     |
| 4 | 0.02982    | 0.60%                  | 99.67%     |
| 5 | 0.01645    | 0.33%                  | 100.00%    |

36

37

38

39

40

41

42  
43  
44  
45  
46  
47  
48

Table S5 Principal Component Analysis loadings for particulate matter and gaseous pollutants during winter season

|                   | Coefficients of PC1 | Coefficients of PC2 | Coefficients of PC3 | Coefficients of PC4 | Coefficients of PC5 |
|-------------------|---------------------|---------------------|---------------------|---------------------|---------------------|
| NO <sub>2</sub>   | 0.17052             | 0.62511             | -0.68016            | 0.33811             | 0.05684             |
| CO <sub>2</sub>   | 0.15223             | 0.62943             | 0.72401             | 0.19259             | 0.13914             |
| PM <sub>1.0</sub> | 0.5833              | 0.20392             | -0.0464             | -0.70731            | -0.34021            |
| PM <sub>2.5</sub> | 0.56183             | -0.27039            | -0.03636            | 0.01215             | 0.78088             |
| PM <sub>10</sub>  | 0.54025             | -0.31363            | 0.09856             | 0.59005             | -0.50189            |

49  
50  
51  
52  
53

Table S6 Principal Component Analysis (PCA) of pre-monsoon data: eigenvalues and explained variance

|   | Eigenvalue | Percentage of Variance | Cumulative |
|---|------------|------------------------|------------|
| 1 | 3.19319    | 63.86%                 | 63.86%     |
| 2 | 0.86473    | 17.29%                 | 81.16%     |
| 3 | 0.67936    | 13.59%                 | 94.75%     |
| 4 | 0.23923    | 4.78%                  | 99.53%     |
| 5 | 0.0235     | 0.47%                  | 100.00%    |

54  
55  
56  
57  
58

Table S7 Principal Component Analysis loadings for particulate matter and gaseous pollutants during pre-monsoon season

|                   | Coefficients of PC1 | Coefficients of PC2 | Coefficients of PC3 | Coefficients of PC4 | Coefficients of PC5 |
|-------------------|---------------------|---------------------|---------------------|---------------------|---------------------|
| NO <sub>2</sub>   | 0.35619             | 0.78428             | 0.06496             | 0.50105             | 0.05256             |
| CO <sub>2</sub>   | 0.35584             | -0.1996             | 0.9083              | -0.05015            | -0.07755            |
| PM <sub>1.0</sub> | 0.48974             | 0.28075             | -0.15728            | -0.78732            | 0.19165             |
| PM <sub>2.5</sub> | 0.52132             | -0.23749            | -0.31362            | 0.12025             | -0.74767            |
| PM <sub>10</sub>  | 0.48465             | -0.45808            | -0.21835            | 0.33483             | 0.62888             |

59  
60  
61

| Sampling Sites | Winter |          |        | Pre-monsoon |          |        |
|----------------|--------|----------|--------|-------------|----------|--------|
|                | Infant | Children | Adult  | Infant      | Children | Adult  |
| Mirpur-10      | 2.7302 | 1.3821   | 0.9074 | 1.1959      | 0.6054   | 0.3975 |
| Gulistan       | 3.3153 | 1.6783   | 1.1018 | 0.8928      | 0.4520   | 0.2967 |
| Mirpur-1       | 4.7799 | 2.4198   | 1.5886 | 1.4541      | 0.7378   | 0.4844 |
| Banani         | 4.6178 | 2.3377   | 1.5348 | 1.2572      | 0.6364   | 0.4178 |

63

64

65

66

67 Table S8 Hazard Quotient (HQ) data of NO<sub>2</sub> for different age

68

69

70 Table S9 Hazard Quotient (HQ) data of PM<sub>2.5</sub> for different ages

71

| Sampling Sites | Winter |          |        | Pre-monsoon |          |        |
|----------------|--------|----------|--------|-------------|----------|--------|
|                | Infant | Children | Adult  | Infant      | Children | Adult  |
| Mirpur-10      | 1.4957 | 0.7572   | 0.4971 | 1.0645      | 0.5389   | 0.3538 |
| Gulistan       | 1.5788 | 0.7992   | 0.5247 | 1.0554      | 0.5343   | 0.3508 |
| Mirpur-1       | 1.3139 | 0.6652   | 0.4367 | 1.0613      | 0.5373   | 0.3527 |
| Banani         | 1.4389 | 0.7284   | 0.4782 | 1.1458      | 0.5801   | 0.3808 |
| Bijoy Sarani   | 1.3630 | 0.6900   | 0.4530 | 1.1677      | 0.5911   | 0.3881 |

72

|                |        |          |        |             |          |        |
|----------------|--------|----------|--------|-------------|----------|--------|
| Bijoy Sarani   | 1.8358 | 0.9293   | 0.6101 | 1.0390      | 0.5260   | 0.3453 |
| Sampling Sites | Winter |          |        | Pre-monsoon |          |        |
|                | Infant | Children | Adult  | Infant      | Children | Adult  |
| Mirpur-10      | 3.0340 | 1.5359   | 1.0083 | 1.0616      | 0.5374   | 0.3498 |
| Gulistan       | 3.8544 | 1.9512   | 1.2810 | 0.8217      | 0.4160   | 0.2731 |
| Mirpur-1       | 5.3072 | 2.6867   | 1.7639 | 1.2753      | 0.6456   | 0.4238 |
| Banani         | 5.2558 | 2.6606   | 1.7468 | 1.1543      | 0.5844   | 0.3836 |
| Bijoy Sarani   | 1.9420 | 0.9831   | 0.6454 | 1.0582      | 0.5357   | 0.3517 |

73

74

75 Table S10 Hazard Quotient (HQ) data of PM<sub>10</sub> for different ages

76

77 Table S11 Hazard Ratio (HR) data for Health Risk Assessment of CO<sub>2</sub>

| Sampling Sites | Hazard Ratio (HR) |        |
|----------------|-------------------|--------|
|                | Pre-monsoon       | Winter |
| Mirpur-10      | 0.7705            | 0.8069 |
| Gulistan       | 0.7781            | 0.8086 |
| Mirpur-1       | 0.7856            | 0.7694 |
| Banani         | 0.8074            | 0.7928 |
| Bijoy Sarani   | 0.7666            | 0.7832 |

78

79

80

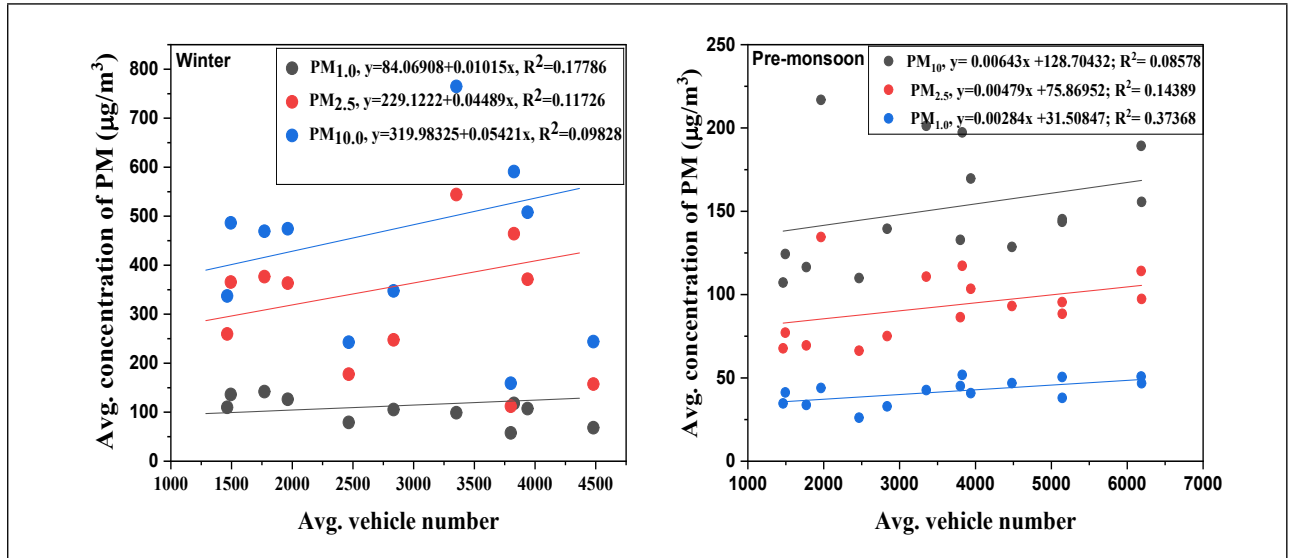

81

82

83 Fig. S1 Correlation coefficient between the average concentration of PM and average vehicle  
84 number at five different traffic intersections in Dhaka city, Bangladesh.

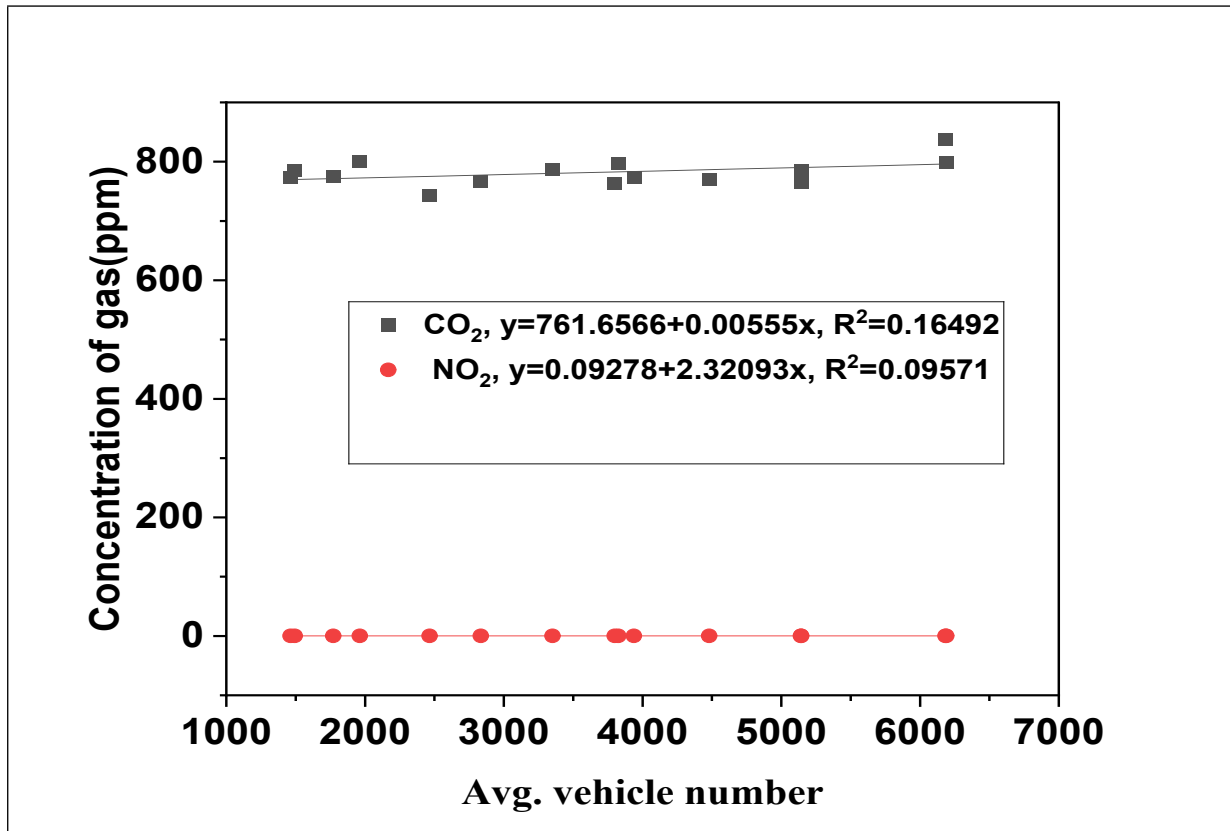

85

86

87 Fig. S2 Correlation coefficient between average concentration of CO<sub>2</sub>, NO<sub>2</sub>, and average  
 88 vehicle number during pre-monsoon at five different traffic intersections in Dhaka city,  
 89 Bangladesh.

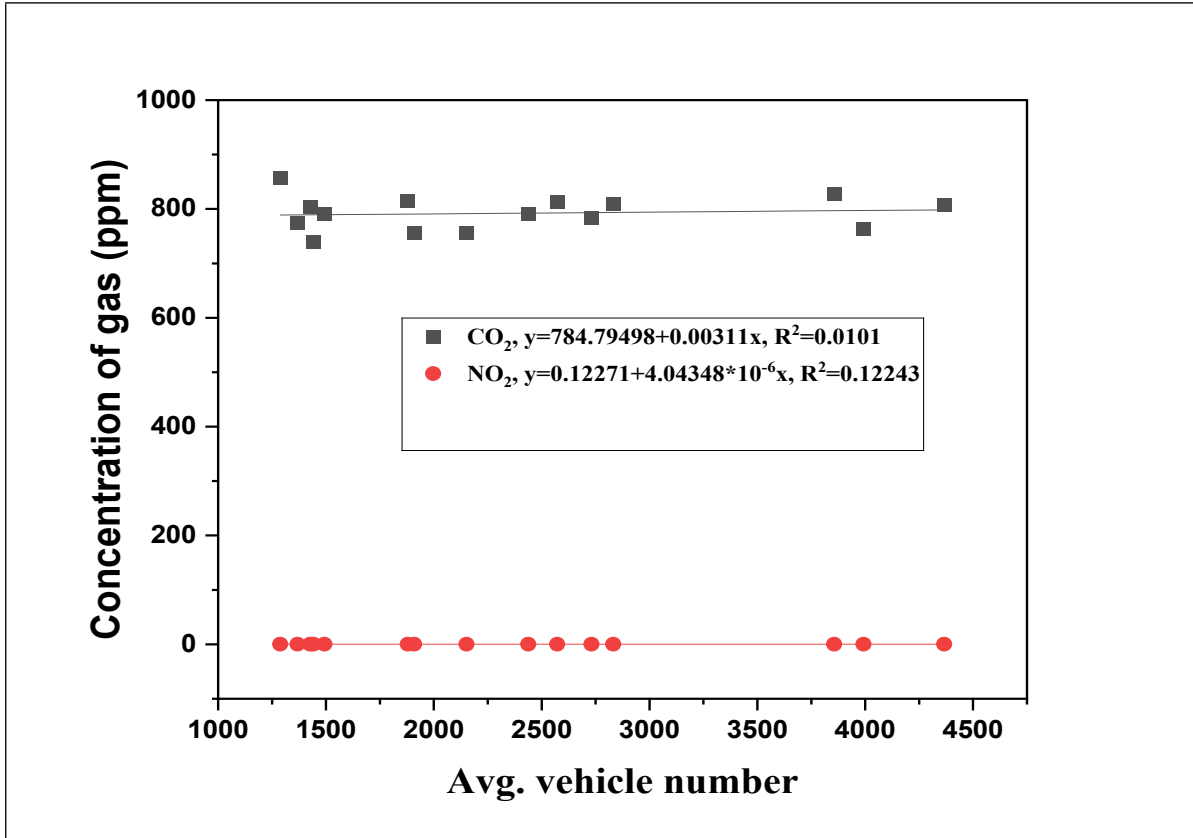

90

91 Fig. S3 Correlation coefficient between average concentration of CO<sub>2</sub>, NO<sub>2</sub>, and average  
 92 vehicle number during winter at five different traffic intersections in Dhaka city, Bangladesh.

93
